# Supplementary material
Source: MDPI journal article supplement (https://www.mdpi.com/2297-8739/9/1/9)

## SUPPORTING INFORMATION

# Rapid and simultaneous determination of free aromatic carboxylic acids and phenols in commercial juices by GC-MS after ethyl chloroformate derivatization

Alessio Incocciati <sup>1</sup>, Elisa Di Fabio <sup>1</sup>, Alberto Boffi <sup>1</sup>, Alessandra Bonamore <sup>1\*</sup> and Alberto Macone <sup>1,\*</sup>

Department of Biochemical Sciences, "Sapienza" University of Rome, p.le A. Moro 5, 00185 Rome, Italy; [alessio.incocciati@uniroma1.it](mailto:alessio.incocciati@uniroma1.it) (A.I.); [elisa.difabio@uniroma1.it](mailto:elisa.difabio@uniroma1.it) (E.D.F.); [alberto.boffi@uniroma1.it](mailto:alberto.boffi@uniroma1.it) (A.B.); [alessandra.bonamore@uniroma1.it](mailto:alessandra.bonamore@uniroma1.it) (A.B.); [alberto.macone@uniroma1.it](mailto:alberto.macone@uniroma1.it) (A.M).

\* Correspondence: [alberto.macone@uniroma1.it](mailto:alberto.macone@uniroma1.it); [alessandra.bonamore@uniroma1.it](mailto:alessandra.bonamore@uniroma1.it) (A.M. and A.B.)

**Figure S1:** Electron impact (70 eV) mass spectra of aromatic carboxylic acids and phenols extracted/derivatized with ECF.

**Figure S2:** Effect of filtration with diatomaceous earth on the content of aromatic carboxylic acids and phenols in blueberry juice.

**Figure S1. Electron impact (70 eV) mass spectra of aromatic carboxylic acids and phenols extracted/derivatized with ECF. Carboxylic moieties are derivatized as ethyl esters whereas hydroxyl groups as ethoxycarbonyl derivatives.**

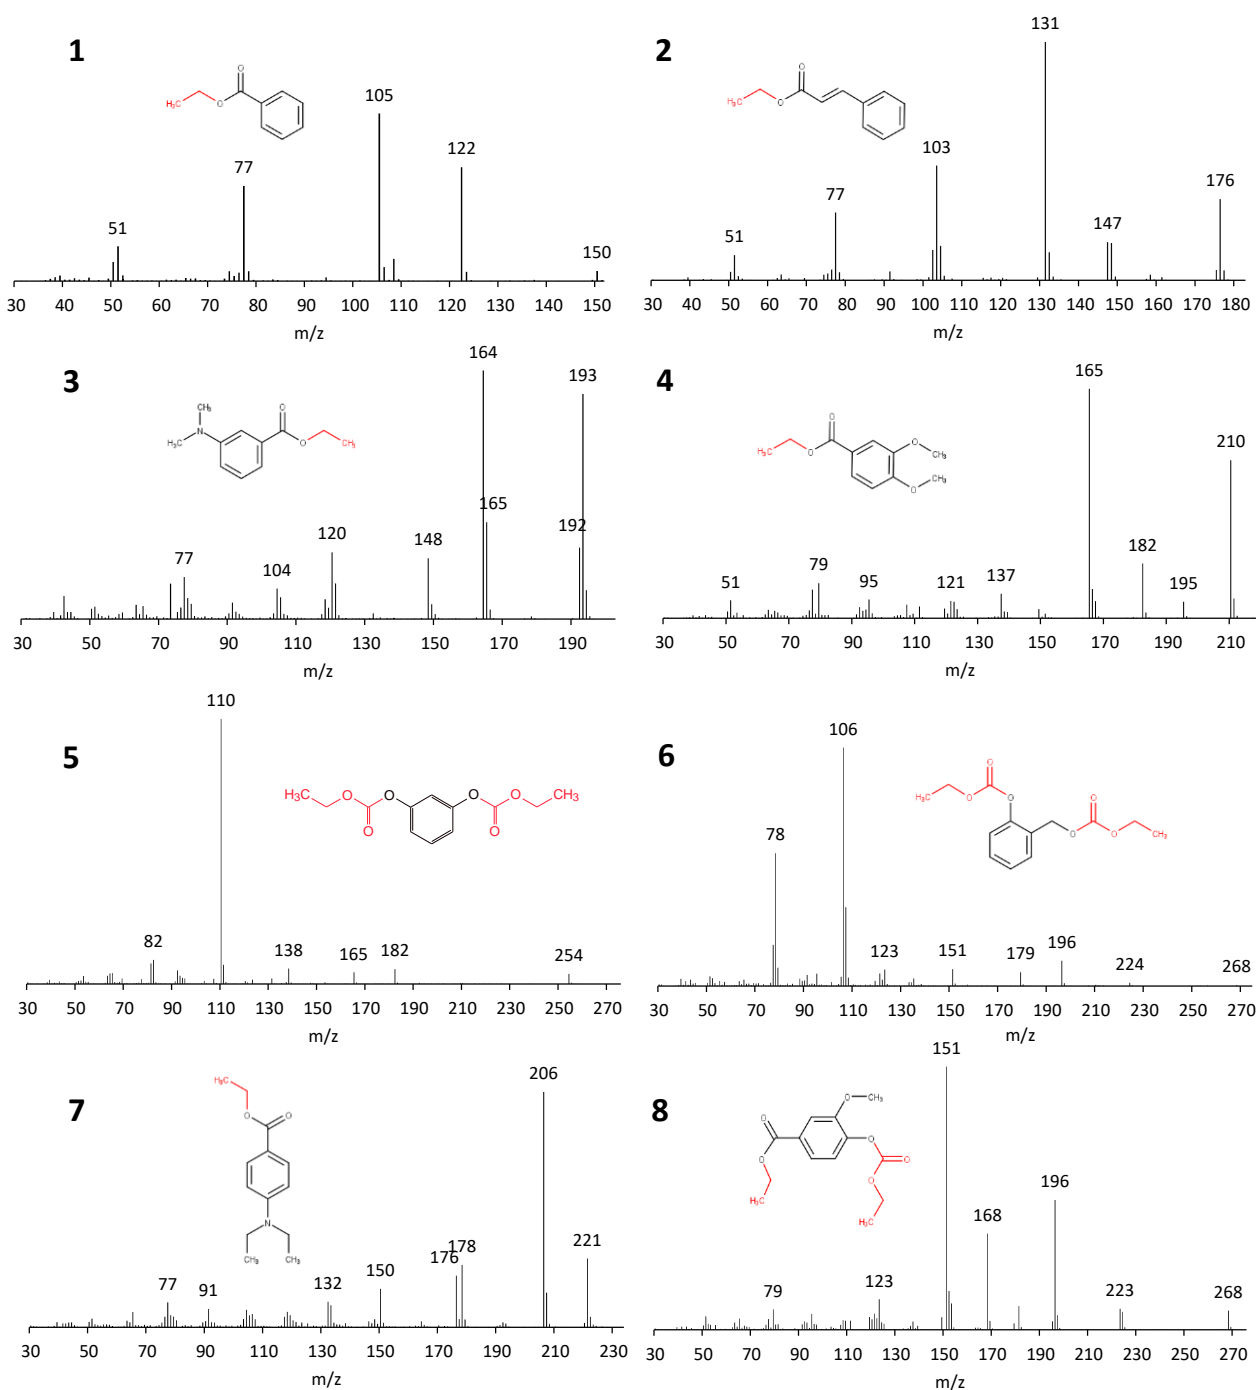

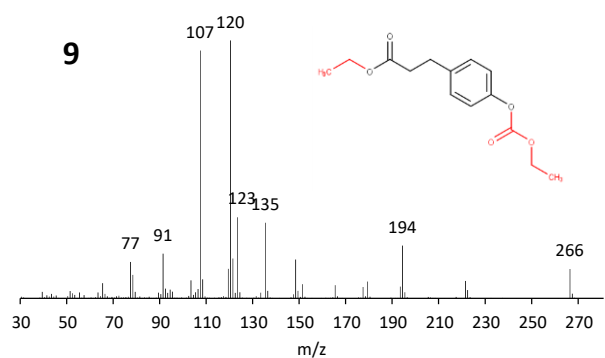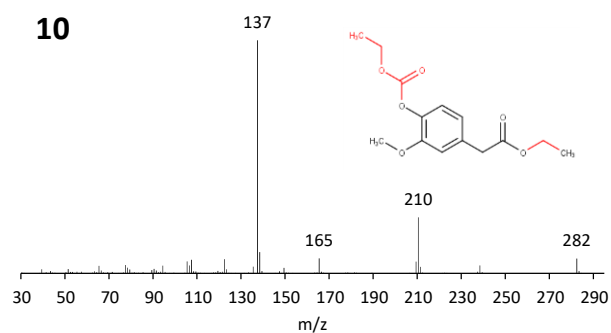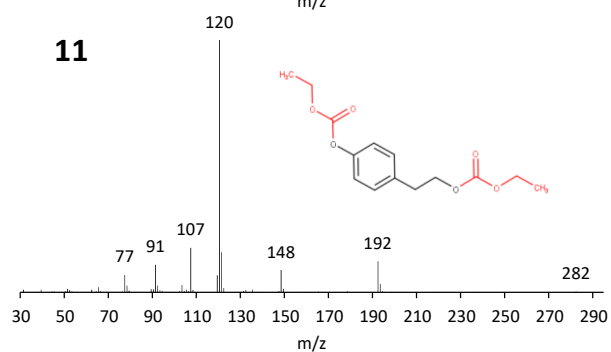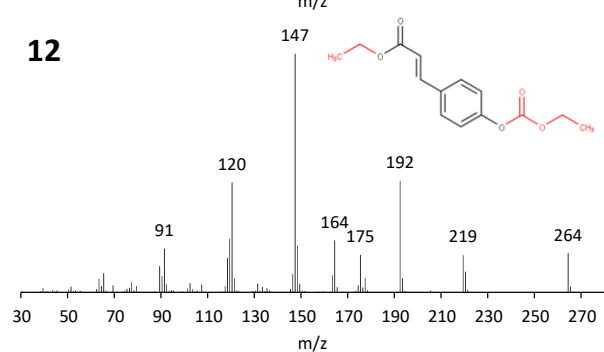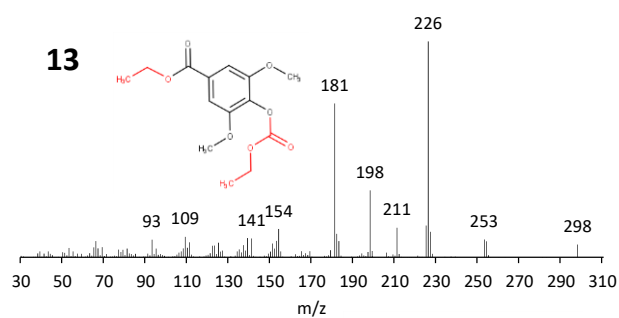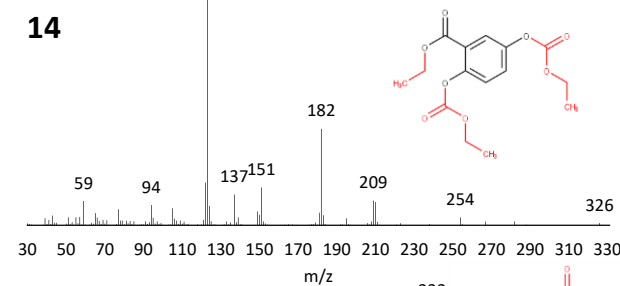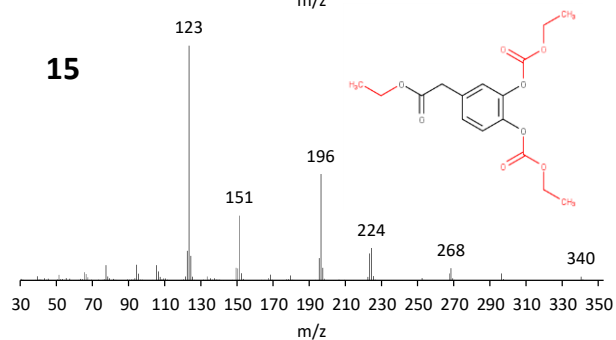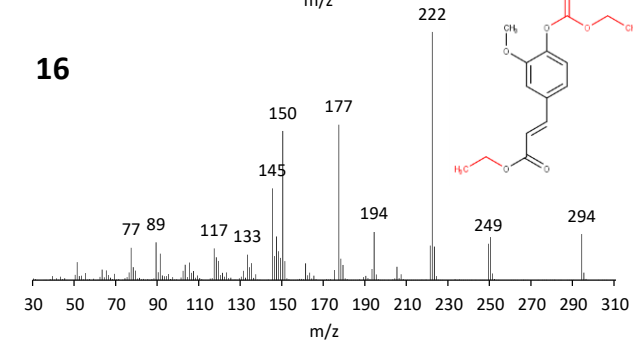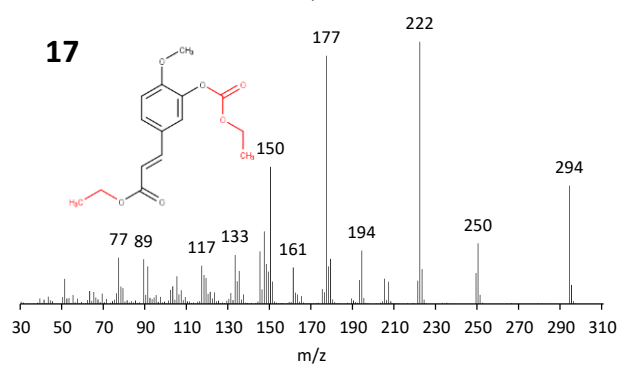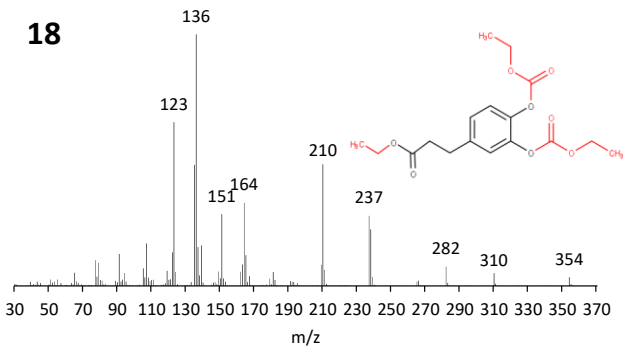

19

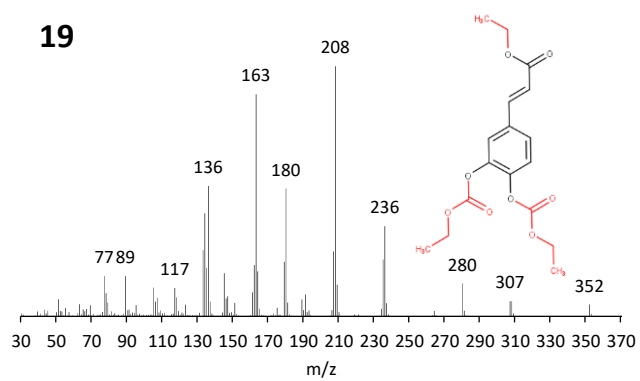

**Figure S2: Effect of filtration with diatomaceous earth on the content of aromatic carboxylic acids and phenols in blueberry juice.** Values are the mean  $\pm$  SD of three independent extraction/derivatization experiments. Values are reported as %.

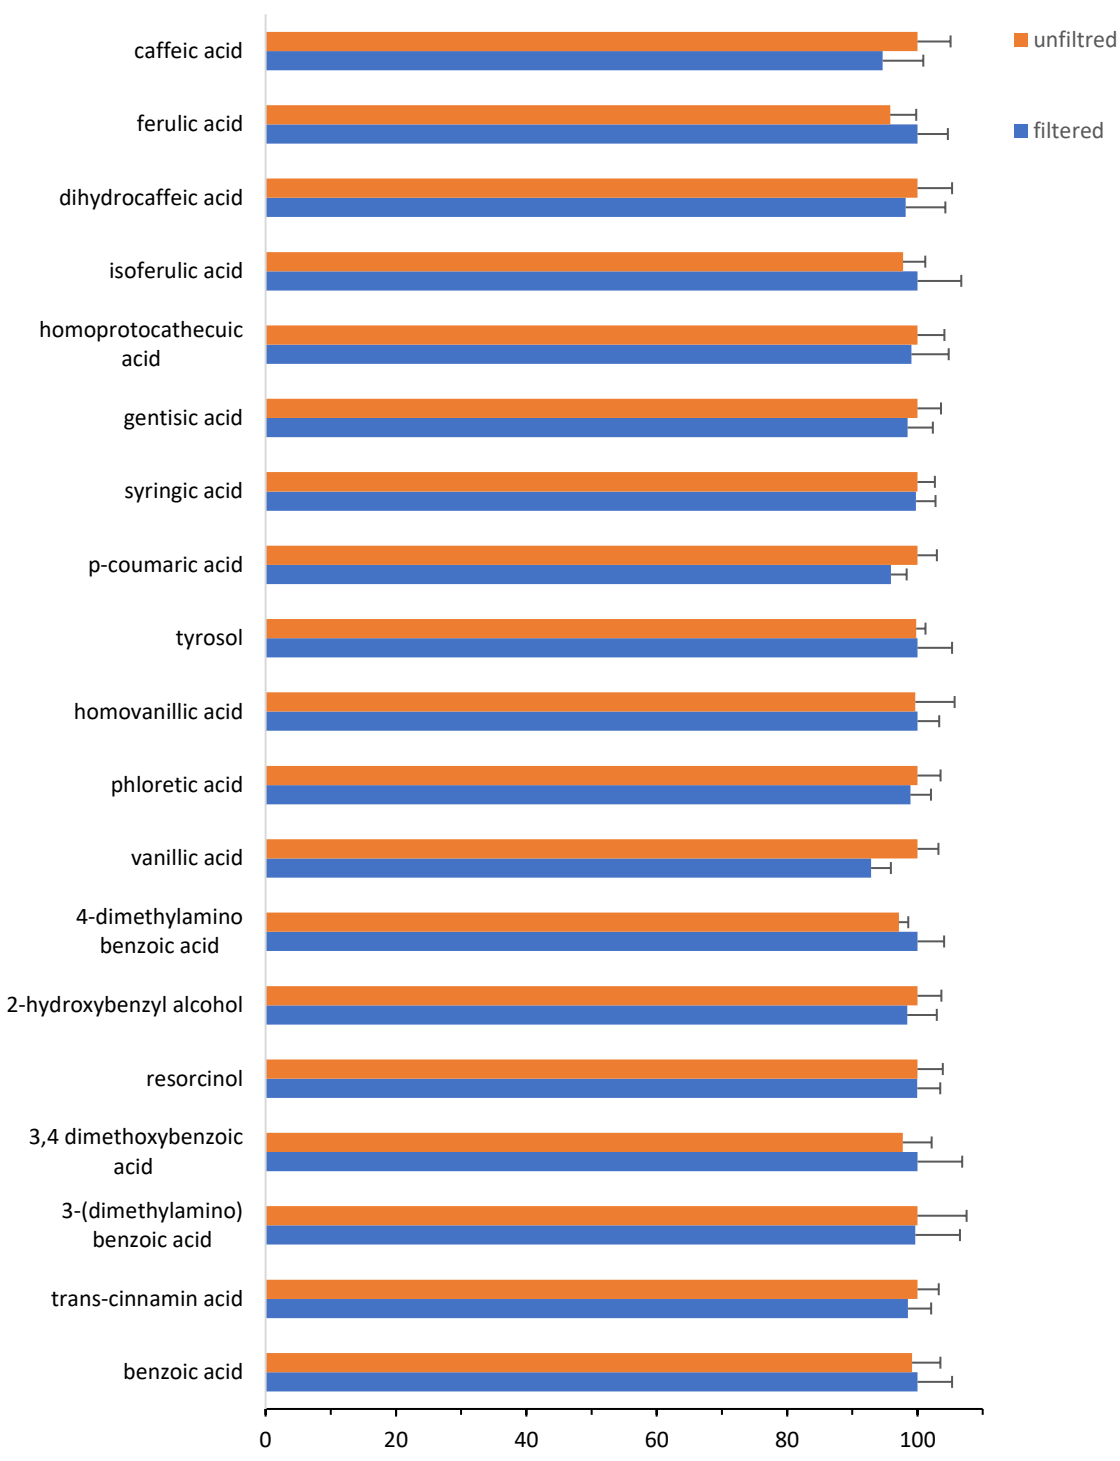

Supplement: s1 [file s1]
